# Supplementary material for: Osteoarthritic changes rather than age predict outcome following arthroscopic treatment of femoroacetabular impingement in middle-aged patients
Source: Springer Nature journal article supplement (doi:10.1186/s12891-016-1108-6), 2016-06-08
Supplement: MOESM1 [file 10244154]

## Telefoninterview

### Telefonische Aufklärung über die Studie:

Ziel der Studie: Auswertung der bisher durchgeführten Hüftarthroskopien bei Hüftimpingement um das postoperative Ergebnis verschiedener Altersgruppen zu vergleichen. Anhand der vorliegenden Unterlagen sollen Faktoren ermittelt werden, die Einfluss auf das postoperative Ergebnis haben. Ziel ist es damit, für zukünftige Patienten die Erfolgsaussichten mit Hüftarthroskopie genauer abzuschätzen.

Methodik: Kurzes Telefoninterview von ca. 5min Dauer. Auswertung der bereits vorliegenden Unterlagen und Daten: OP-Berichte, Röntgenbilder, Arztbriefe. Die Daten werden für die Auswertung anonymisiert.

Zur Studienteilnahme: Teilnahme ist freiwillig, es entstehen keine Vorteile für Teilnehmer an der Studie. Neben dem Telefoninterview keine weitere Befragung oder Untersuchung. Alle Daten werden für die Auswertung anonymisiert. Einverständnis kann jederzeit widerrufen werden ohne Einfluss auf die weitere Behandlung in unserer Klinik. Bestehen noch Fragen zur Studie oder zur Teilnahme?

1. Patient erklärt sein Einverständnis zur Teilnahme an der retrospektiven Studie.

O Ja

O Nein

2. Weitere Operationen an der von uns operierten Hüfte? Bei weitere Operation: Wann und was wurde operiert (weitere HASK oder HTEP?)

3. Subjektive Veränderung der Funktion der Hüfte im Vergleich zu vor der Operation von -100% (maximale Verschlechterung) bis +100% (maximale Verbesserung)

*„Wie wurden ihre Beschwerden mit der Hüfte durch die Operation auf einer Skala von -100% bis +100% bis heute beeinflusst, wenn -100% die maximale Verschlechterung, 0% ein Gleichbleiben der Beschwerden und 100% die maximale Verbesserung darstellt.“*

Bei Z.n. weiterer Operation:

*„Wie wurden ihre Beschwerden mit der Hüfte durch die Operation auf einer Skala von -100% bis +100% bis zur der weiteren Operation beeinflusst, wenn -100% die maximale Verschlechterung, 0% ein gleich bleiben der Beschwerden und 100% die maximale Verbesserung darstellt.“*

#### 4. Subjektive Zufriedenheit mit Verlauf nach Operation

„Wie zufrieden sind sie insgesamt mit dem Verlauf nach der Operation bis heute: Sehr zufrieden, zufrieden, wenig zufrieden, nicht zufrieden.“

Sehr zufrieden     Zufrieden     Wenig zufrieden     Nicht zufrieden

„Mit dem Wissen über den Verlauf (Behandlungsergebnis und perioperative Einschränkungen), würden Sie den Eingriff nochmals durchführen lassen?“

Ja

Nein

#### 5. HOS Score inkl. HOSS

##### **Hüft Outcome Score (HOS)**

„Bitte beantworten Sie jede Frage mit der Antwort, die Ihren Zustand während der letzten Woche am besten beschreibt. Falls die betreffende Aktivität durch etwas anderes als durch Ihre Hüfte eingeschränkt ist, antworten Sie bitte mit ‚Nicht zutreffend (NZ)‘.“

|                                                         | Keinerlei Schwierigkeiten | Geringe Schwierigkeiten | Mässige Schwierigkeiten | Extreme Schwierigkeiten | Unmöglich | NZ |
|---------------------------------------------------------|---------------------------|-------------------------|-------------------------|-------------------------|-----------|----|
| 1) 15 Minuten stehen                                    |                           |                         |                         |                         |           |    |
| 2) In ein gewöhnliches Auto ein- und aussteigen         |                           |                         |                         |                         |           |    |
| 3) Socken und Schuhe anziehen*                          |                           |                         |                         |                         |           |    |
| 4) Steile Hügel hinauf gehen                            |                           |                         |                         |                         |           |    |
| 5) Steile Hügel hinunter gehen                          |                           |                         |                         |                         |           |    |
| 6) Eine Etage hinauf gehen                              |                           |                         |                         |                         |           |    |
| 7) Eine Etage hinunter gehen                            |                           |                         |                         |                         |           |    |
| 8) Bordsteine rauf und runter gehen                     |                           |                         |                         |                         |           |    |
| 9) Tief in die Hocke gehen                              |                           |                         |                         |                         |           |    |
| 10) In eine oder aus einer Badewanne steigen            |                           |                         |                         |                         |           |    |
| 11) 15 Minuten sitzen                                   |                           |                         |                         |                         |           |    |
| 12) Die ersten Schritte Gehen                           |                           |                         |                         |                         |           |    |
| 13) Etwa 10 Minuten gehen                               |                           |                         |                         |                         |           |    |
| 14) 15 Minuten oder länger gehen                        |                           |                         |                         |                         |           |    |
| 15) Sich auf dem betroffenen Bein drehen                |                           |                         |                         |                         |           |    |
| 16) Sich im Bett umdrehen                               |                           |                         |                         |                         |           |    |
| 17) Leichte bis mittelschwere Arbeit (Stehen, Gehen)    |                           |                         |                         |                         |           |    |
| 18) Schwere Arbeit (Schieben, Ziehen, Klettern, Tragen) |                           |                         |                         |                         |           |    |
| 19) Freizeitaktivitäten                                 |                           |                         |                         |                         |           |    |

## Hüft Outcome Sport Score (HOSS)

|                                                                 | Keinerlei Schwierigkeiten | Geringe Schwierigkeiten | Mässige Schwierigkeiten | Extreme Schwierigkeiten | Unmöglich | NZ |
|-----------------------------------------------------------------|---------------------------|-------------------------|-------------------------|-------------------------|-----------|----|
| S1) 1-2 km Joggen                                               |                           |                         |                         |                         |           |    |
| S2) Springen/Hüpfen                                             |                           |                         |                         |                         |           |    |
| S3) Gegenstände wie z. B. einen Golfschläger schwingen          |                           |                         |                         |                         |           |    |
| S4) Landen                                                      |                           |                         |                         |                         |           |    |
| S5) Schnell losrennen und abstoppen                             |                           |                         |                         |                         |           |    |
| S6) Hacken schlagen/seitliche Bewegungen                        |                           |                         |                         |                         |           |    |
| S7) Wenig belastende Aktivitäten wie schnelles Gehen            |                           |                         |                         |                         |           |    |
| S8) Aktivitäten so ausüben, wie Sie es normalerweise tun        |                           |                         |                         |                         |           |    |
| S9) Einen gewünschten Sport so lange ausüben, wie Sie es wollen |                           |                         |                         |                         |           |    |

### 6. Gab es Komplikationen?

- a) Keine
- b) Wundheilungsstörung/Infekt
- c) Fraktur
- d) Nervenschaden temporär (ggf. welche)
- e) Nervenschaden dauerhaft (ggf. welche)
- f) Sonstige

### 7. Wenn ja, war eine Revisionsoperation wegen Komplikationen erforderlich?

- a) Ja, ggf. welche
- b) nein
