# Supplementary material for: Osteoarthritic changes rather than age predict outcome following arthroscopic treatment of femoroacetabular impingement in middle-aged patients
Source: Springer Nature journal article supplement (doi:10.1186/s12891-016-1108-6), 2016-06-08
Supplement: MOESM2 [file 10244154]

| No° | THA               | Age   | Follow up | Survival | Change | Satisfaction | ChooseAgain   | HOS | HOSS | alphaAngle | CCD | LCE | AI | JS  | KL grade |   |
|-----|-------------------|-------|-----------|----------|--------|--------------|---------------|-----|------|------------|-----|-----|----|-----|----------|---|
|     | 0-nonTHA<br>1-THA | years | months    | months   |        |              | 0-No<br>1-Yes |     |      | °          | °   | °   | °  | mm  |          |   |
| 1   | 1                 | 44    | 53        | 23       | -100   |              | 1             | 0   |      |            | 130 | 31  | 4  | 2,3 | 2        |   |
| 2   | 1                 | 52    | 49        | 45       | 0      |              | 4             | 0   |      | 93         | 134 | 22  | 15 | 3,2 | 2        |   |
| 3   | 1                 | 44    | 52        | 38       | 0      |              | 4             | 0   |      | 68         | 124 | 21  | 16 | 0   | 3        |   |
| 4   | 1                 | 44    | 52        | 20       | 0      |              | 2             | 1   |      |            | 133 | 39  | 6  | 2,7 | 2        |   |
| 5   | 1                 | 49    | 51        | 26       | 0      |              | 4             | 0   |      | 59         | 124 | 32  | 3  | 4,8 | 1        |   |
| 6   | 1                 | 46    | 48        | 14       | 50     |              | 2             | 0   |      | 44         | 137 | 42  | 1  | 3,4 | 1        |   |
| 7   | 1                 | 50    | 47        | 37       | 60     |              | 3             | 0   |      | 65         |     |     |    | 2,4 | 2        |   |
| 8   | 1                 | 47    | 47        | 16       | -70    |              | 4             | 0   |      |            | 127 | 27  | 11 | 2,2 | 1        |   |
| 9   | 1                 | 43    | 46        | 23       | 20     |              | 2             | 0   |      |            | 130 | 20  | 5  | 1,2 | 3        |   |
| 10  | 1                 | 63    | 36        | 5        | 100    |              | 4             | 1   |      | 60         | 130 | 35  | 6  | 1,7 | 3        |   |
| 11  | 1                 | 46    | 39        | 12       | 0      |              | 3             | 1   |      |            | 129 | 23  | 6  | 0,8 | 3        |   |
| 12  | 1                 | 54    | 37        | 6        | 0      |              | 3             | 0   |      | 58         | 137 | 45  | 2  | 2,6 | 3        |   |
| 13  | 1                 | 46    | 32        | 19       | -90    |              | 1             | 0   |      |            | 140 | 22  | 15 | 2,3 | 1        |   |
| 14  | 1                 | 51    | 31        | 12       | 50     |              | 3             | 0   |      |            | 131 | 34  | 10 | 1,8 | 2        |   |
| 15  | 1                 | 53    | 27        | 8        | 100    |              | 3             | 1   |      | 87         | 137 | 40  | 10 | 4   | 2        |   |
| 16  | 1                 | 57    | 16        | 10       | -100   |              | 1             | 0   |      | 67         | 131 | 31  | 12 | 2,1 | 3        |   |
| 17  | 1                 | 52    | 20        | 16       | 90     |              | 3             | 1   |      | 57         | 123 | 25  | 7  | 1,9 | 2        |   |
| 18  | 1                 | 58    | 19        | 5        | 0      |              | 1             | 0   |      | 54         | 126 | 46  | -4 | 2,7 | 2        |   |
| 19  | 0                 | 42    | 55        | 55       | 70     |              | 3             | 1   | 74   | 57         | 51  | 130 | 35 | 4   | 1,9      | 2 |
| 20  | 0                 | 43    | 53        | 53       | 50     |              | 4             | 1   | 79   | 39         | 81  | 134 | 32 | 2   | 2,5      | 3 |
| 21  | 0                 | 43    | 48        | 48       | 50     |              | 2             | 1   | 97   | 44         |     | 125 | 29 | 11  | 2,9      | 2 |
| 22  | 0                 | 50    | 49        | 49       | 100    |              | 4             | 1   | 100  | 100        |     | 126 | 19 | 11  | 3,7      | 1 |
| 23  | 0                 | 40    | 49        | 49       | 40     |              | 3             | 1   | 75   | 47         |     | 130 | 38 | 5   | 3,8      | 2 |
| 24  | 0                 | 52    | 48        | 48       | 20     |              | 2             | 0   | 57   | 22         | 54  | 134 | 13 | 20  | 4,2      | 1 |
| 25  | 0                 | 45    | 47        | 47       | 100    |              | 4             | 1   | 100  | 100        | 76  | 131 | 34 | 7   | 3,4      | 2 |
| 26  | 0                 | 47    | 46        | 46       | 100    |              | 2             | 0   | 72   | 39         | 51  | 125 | 32 | 5   | 3        | 0 |
| 27  | 0                 | 45    | 46        | 46       | 40     |              | 4             | 1   | 87   | 36         |     | 127 | 31 | 10  | 3,8      | 2 |

|    |   |    |    |    |      |   |   |    |     |    |     |    |    |     |   |
|----|---|----|----|----|------|---|---|----|-----|----|-----|----|----|-----|---|
| 28 | 0 | 56 | 41 | 41 | 0    | 2 | 0 | 74 | 39  | 94 | 136 | 32 | 14 | 3,7 | 1 |
| 29 | 0 | 40 | 45 | 45 | 80   | 4 | 1 |    |     | 62 | 129 | 25 | 9  | 3,4 | 1 |
| 30 | 0 | 46 | 45 | 45 | 40   | 4 | 1 | 96 | 66  | 61 | 134 | 24 | 5  | 4,4 | 1 |
| 31 | 0 | 46 | 44 | 44 | 0    | 4 | 1 | 68 | 22  | 55 | 126 | 27 | 8  | 4,6 | 2 |
| 32 | 0 | 43 | 43 | 43 | 100  | 4 | 1 | 96 | 100 | 76 | 139 | 41 | 5  | 2,1 | 1 |
| 33 | 0 | 47 | 43 | 43 | -20  | 4 | 1 | 87 | 72  |    | 118 | 28 | 6  | 3,4 | 2 |
| 34 | 0 | 45 | 43 | 43 | 50   | 4 | 1 | 82 | 50  | 90 | 140 | 24 | 6  | 3,8 | 1 |
| 35 | 0 | 41 | 42 | 42 | -100 | 3 | 0 | 41 | 31  |    | 128 | 28 | 7  | 3,3 | 1 |
| 36 | 0 | 64 | 36 | 36 | 40   | 3 | 1 | 87 | 81  | 64 | 134 | 34 | 6  | 3,3 | 1 |
| 37 | 0 | 43 | 41 | 41 | 0    | 1 | 0 | 76 | 83  | 59 | 132 | 32 | 1  | 4,7 | 1 |
| 38 | 0 | 41 | 41 | 41 | 50   | 3 | 1 | 84 | 50  | 67 |     |    |    | 3,5 | 1 |
| 39 | 0 | 50 | 41 | 41 | 40   | 3 | 1 | 72 | 50  | 48 | 125 | 32 | 5  | 2,8 | 1 |
| 40 | 0 | 55 | 41 | 41 | 100  | 4 | 1 | 76 | 60  | 83 | 135 | 14 | 24 | 3,6 | 2 |
| 41 | 0 | 44 | 41 | 41 | 50   | 4 | 1 | 79 | 39  | 68 | 132 | 28 | 6  | 2,4 | 3 |
| 42 | 0 | 62 | 33 | 33 | 30   | 3 | 1 | 57 | 28  | 72 | 140 | 41 |    | 4,2 | 2 |
| 43 | 0 | 47 | 37 | 37 | 0    | 3 | 1 | 71 | 47  | 54 | 138 | 41 | 3  | 4,3 | 0 |
| 44 | 0 | 58 | 37 | 37 | 0    | 3 | 0 | 41 | 28  |    | 127 | 37 | 7  | 1,9 | 2 |
| 45 | 0 | 45 | 32 | 32 | 80   | 3 | 1 | 97 | 56  | 70 | 137 | 32 | 7  | 4,9 | 2 |
| 46 | 0 | 46 | 30 | 30 | 100  | 4 | 1 | 97 | 64  | 85 | 143 | 36 | 8  | 4,1 | 1 |
| 47 | 0 | 40 | 34 | 34 | 90   | 4 | 1 | 99 | 100 | 78 | 124 | 31 | 3  | 2,7 | 1 |
| 48 | 0 | 49 | 33 | 33 | 80   | 3 | 1 | 87 | 94  | 75 | 135 | 25 | 10 | 2,4 | 3 |
| 49 | 0 | 44 | 32 | 32 | 80   | 3 | 1 | 94 | 100 | 55 | 129 | 22 | 13 | 4,9 | 0 |
| 50 | 0 | 60 | 25 | 25 | 50   | 2 | 1 | 63 | 31  | 74 | 129 | 35 | 11 | 2,8 | 1 |
| 51 | 0 | 45 | 26 | 26 | 50   | 4 | 1 | 93 | 83  | 77 | 142 | 33 | 8  | 2,8 | 2 |
| 52 | 0 | 41 | 30 | 30 | 70   | 3 | 1 | 94 | 88  | 61 | 140 | 34 | 4  | 4,8 | 1 |
| 53 | 0 | 49 | 28 | 28 | 50   | 3 | 1 | 62 | 28  | 65 | 136 | 39 | 0  | 3,4 | 2 |
| 54 | 0 | 48 | 23 | 23 | 100  | 3 | 1 | 87 | 42  | 70 | 129 | 19 | 12 | 4,3 | 0 |
| 55 | 0 | 43 | 27 | 27 | 60   | 4 | 1 | 65 | 67  | 78 | 129 | 48 | -2 | 4,1 | 1 |
| 56 | 0 | 45 | 23 | 23 | 20   | 2 | 0 | 63 | 53  | 76 | 135 | 37 | 2  | 2,9 | 2 |
| 57 | 0 | 52 | 26 | 26 | 60   | 3 | 1 | 85 | 75  |    | 124 | 45 | 1  | 3,6 | 2 |
| 58 | 0 | 50 | 21 | 21 | 75   | 3 | 1 | 76 | 78  | 46 | 133 | 19 | 18 | 2,6 | 1 |
| 59 | 0 | 42 | 24 | 24 | 100  | 3 | 1 | 91 | 78  |    | 128 | 36 | -2 | 5   | 0 |
| 60 | 0 | 60 | 18 | 18 | 100  | 3 | 1 | 82 | 89  | 78 | 138 | 32 | 7  | 4,7 | 2 |

|    |   |    |    |    |     |   |   |     |     |    |     |    |    |     |   |
|----|---|----|----|----|-----|---|---|-----|-----|----|-----|----|----|-----|---|
| 61 | 0 | 47 | 22 | 22 | 100 | 4 | 1 | 100 | 86  |    | 140 | 39 | 1  | 3,4 | 1 |
| 62 | 0 | 52 | 22 | 22 | 0   | 1 | 0 | 47  | 44  |    | 125 | 29 | 10 | 3,7 | 1 |
| 63 | 0 | 63 | 17 | 17 | 100 | 4 | 1 | 100 | 100 | 41 | 126 | 31 | 14 | 4,6 | 1 |
| 64 | 0 | 49 | 22 | 22 | 0   | 4 | 0 | 86  | 58  | 69 | 129 | 31 | 9  | 4,5 | 0 |
| 65 | 0 | 41 | 17 | 17 | 100 | 4 | 1 | 100 | 100 | 78 | 129 | 40 | 3  | 3,1 | 1 |
| 66 | 0 | 58 | 16 | 16 | 70  | 4 | 1 | 95  | 81  | 60 | 133 | 42 | 1  | 2,4 | 2 |
| 67 | 0 | 49 | 21 | 21 | 100 | 4 | 1 | 99  | 94  | 83 | 128 | 26 | 12 | 2,6 | 1 |
| 68 | 0 | 43 | 17 | 17 | 80  | 3 | 1 | 76  | 47  | 70 | 132 | 38 | 4  | 2,7 | 1 |
| 69 | 0 | 44 | 19 | 19 | -30 | 2 | 0 | 75  | 56  | 85 | 122 | 33 | 3  | 3,3 | 0 |
| 70 | 0 | 56 | 18 | 18 | 10  | 4 | 0 | 72  | 68  | 49 | 126 | 32 | 11 | 3,6 | 1 |
| 71 | 0 | 52 | 18 | 18 | 70  | 3 | 1 | 48  | 31  | 50 | 124 | 39 | -1 | 4   | 1 |
| 72 | 0 | 53 | 18 | 18 | 50  | 4 | 1 | 52  | 36  | 75 | 119 | 34 | 7  | 2,8 | 2 |
| 73 | 0 | 48 | 15 | 15 | 70  | 3 | 1 | 65  | 53  | 59 | 129 | 33 | 1  | 3   | 1 |
| 74 | 0 | 44 | 15 | 15 | 70  | 4 | 1 | 94  | 89  | 75 | 129 | 46 | -4 | 3   | 1 |
| 75 | 0 | 40 | 14 | 14 | 100 | 3 | 1 | 97  | 100 | 73 | 130 | 35 | 8  | 4,6 | 1 |
| 76 | 0 | 53 | 13 | 13 | 30  | 2 | 0 |     |     |    | 131 | 24 | 10 | 3,4 | 1 |
| 77 | 0 | 51 | 12 | 12 | 80  | 3 | 1 | 87  | 81  | 69 | 130 | 32 | -2 | 4,2 | 1 |
| 78 | 0 | 53 | 12 | 12 | 20  | 1 | 0 |     |     | 56 | 131 | 30 | 6  | 4   | 0 |
| 79 | 0 | 48 | 12 | 12 | 100 | 4 | 1 | 94  | 86  | 60 | 136 | 37 | -6 | 4,1 | 1 |
